# Supplementary material
Source: Frontiers journal article supplement (https://www.frontiersin.org/articles/126795)
Supplement: Image_2.PDF [file Image_2.PDF]

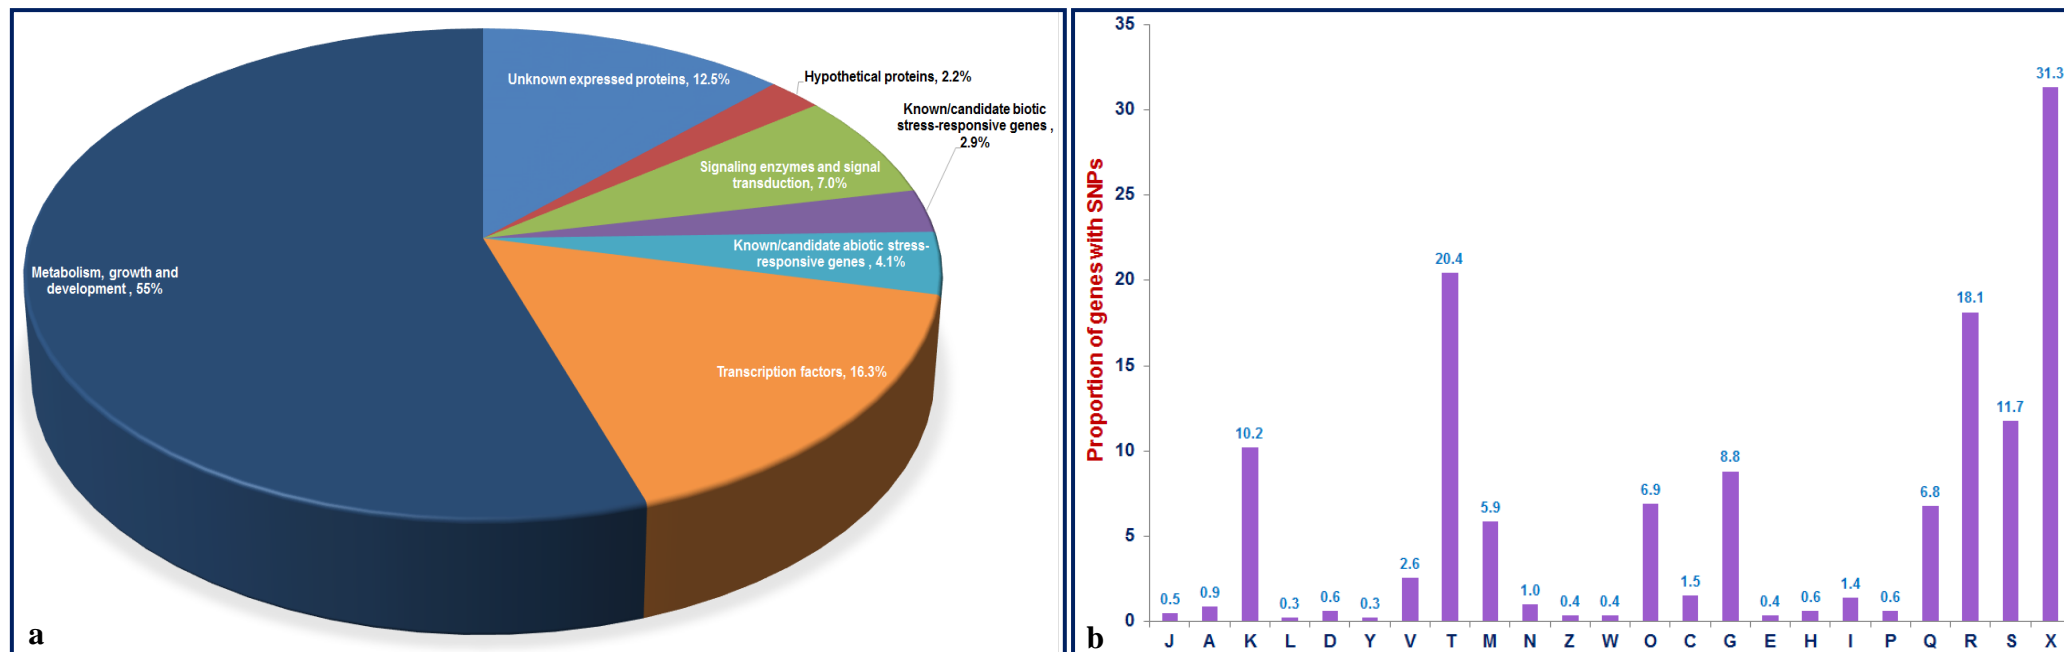

**Fig. S2:** (a) Functional annotation of SNP-carrying 5588 chickpea genes. (b) KOG-based putative function determination of genes identified with SNPs. The diverse KOG classes are defined as J: Translation, ribosomal structure and biogenesis, A: RNA processing and modification, K: Transcription, L: Replication, recombination and repair, D: Cell cycle control, cell division and chromosome partitioning, Y: Nuclear structure, V: Defence mechanisms, T: Signal transduction mechanisms, M: Cell wall/membrane/envelope biogenesis, N: Cell motility, Z: Cytoskeleton, W: Extracellular structures, O: Post-translational modification, protein turnover and chaperones, C: Energy production and conversion, G: Carbohydrate transport and metabolism, E: Amino acid transport and metabolism, H: Coenzyme transport and metabolism, I: Lipid transport and metabolism, P: Inorganic ion transport and metabolism, Q: Secondary metabolites biosynthesis, transport and catabolism, R: General function prediction only, S: Function unknown and X: Unnamed proteins.
