# Supplementary material
Source: Frontiers journal article supplement (https://www.frontiersin.org/articles/126795)
Supplement: Image_6.PDF [file Image_6.PDF]

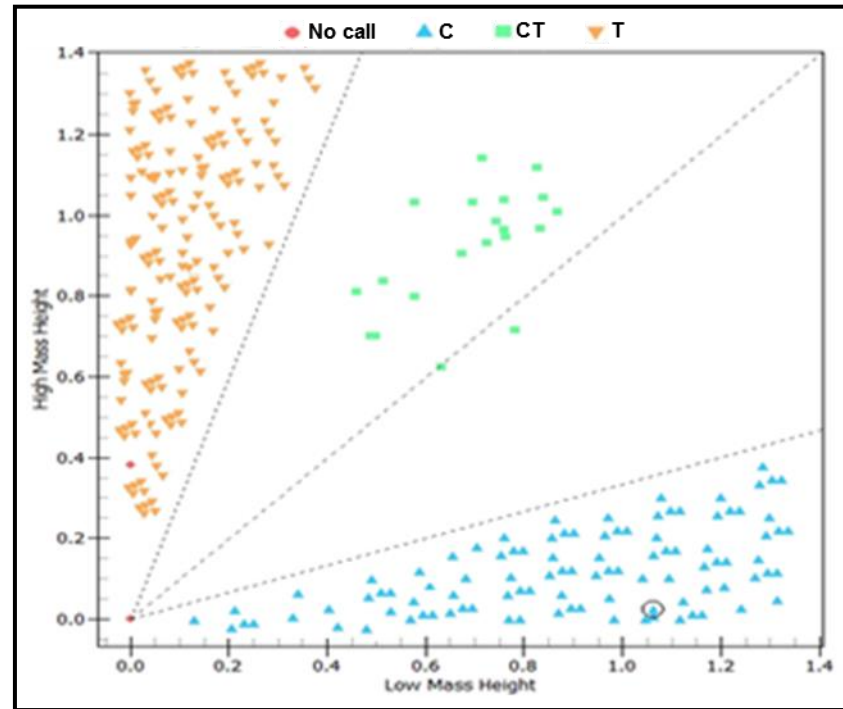

**Fig. S6:** Call cluster plot for one representative GBS-based SNP locus (C/T) demonstrating its validation and genotyping potential in 93 cultivated *desi*, *kabuli* and wild chickpea accessions assayed using a MALDI-TOF mass array. Distinct differentiation of homozygous and heterozygous SNPs based on the mass differences of corresponding alleles are evident.
